# Supplementary material for: Neutral lutetium complex/polyamine mediated immortal ring-opening polymerization of rac-lactide: facile synthesis of well-defined hydroxyl-end and amide-core stereoregular star polylactide
Source: Royal Society of Chemistry journal article supplement (doi:10.1039/c5py01164g), 2015-01-01
Supplement: c5py01164g1.pdf [file c5py01164g1.pdf]

## Supporting information

# Neutral lutetium complex/polyamine mediated immortal ring-opening polymerization of *rac*-lactide: facile synthesis of well-defined hydroxyl-end and amide-core stereoregular star polylactide†

Wei Zhao,<sup>†,‡</sup> Bo Liu,<sup>†</sup> Xinli Liu,<sup>†</sup> Xue Wang,<sup>†,‡</sup> Yang Wang,<sup>†,‡</sup> Changguang Yao,<sup>†,‡</sup>

Chunji Wu<sup>\*,†</sup> and Dongmei Cui<sup>\*,†</sup>

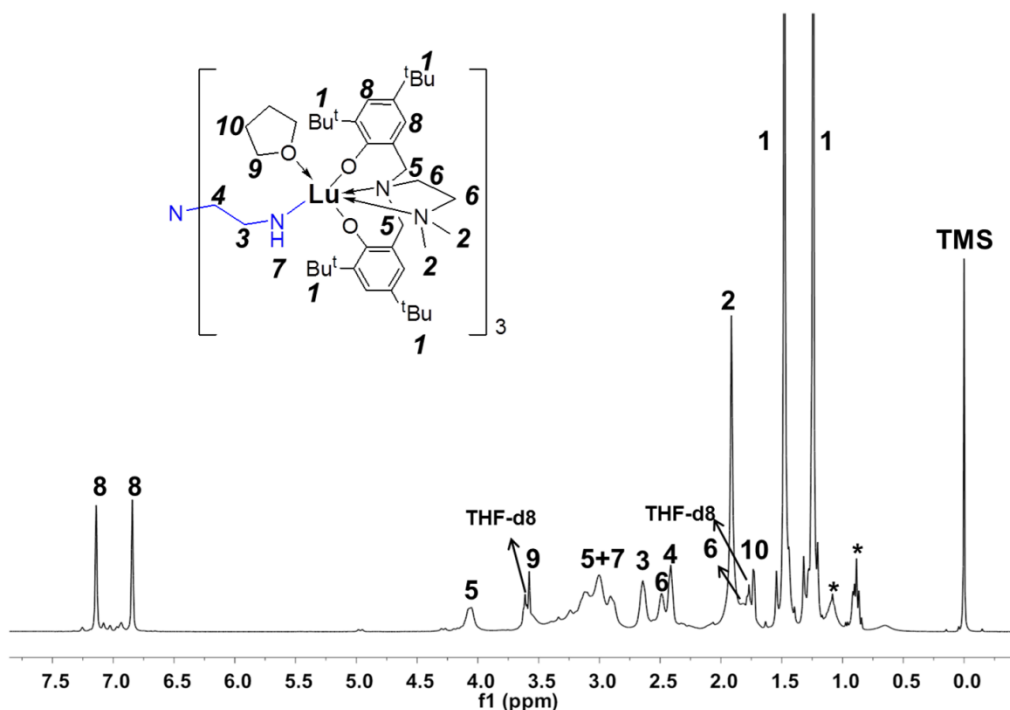

Figure S1. <sup>1</sup>H NMR spectrum of complex 2 (600 MHz, THF-d8, 25°C).

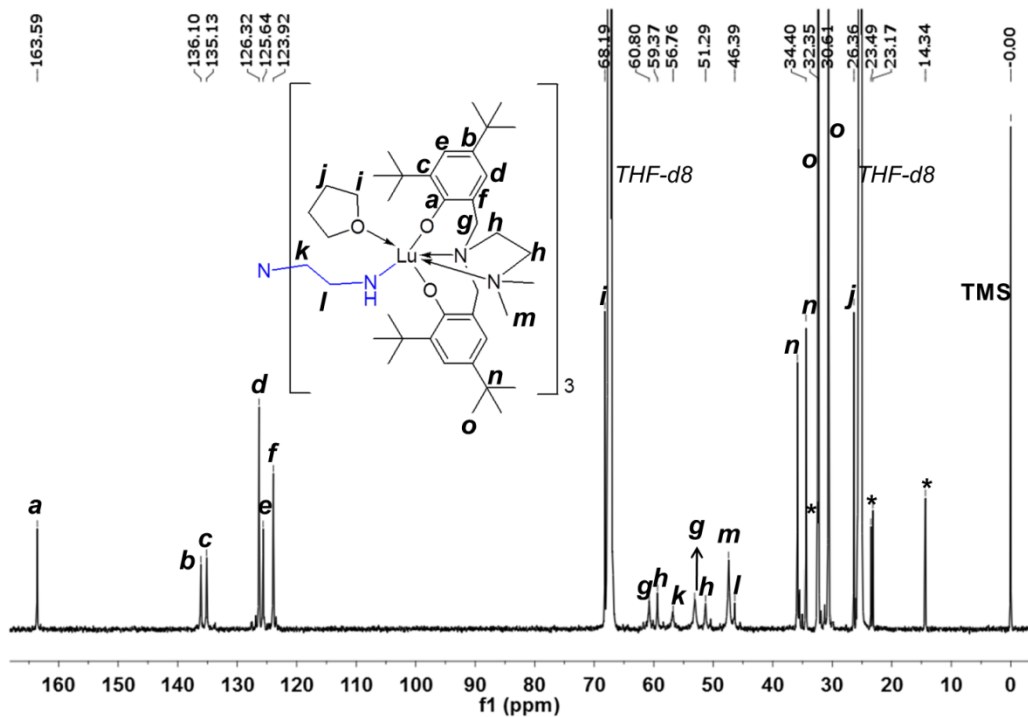

**Figure S2.**  $^{13}\text{C}$  NMR spectrum of complex **2** (150 MHz, THF-d<sub>8</sub>, 25°C, \* residual hexane).

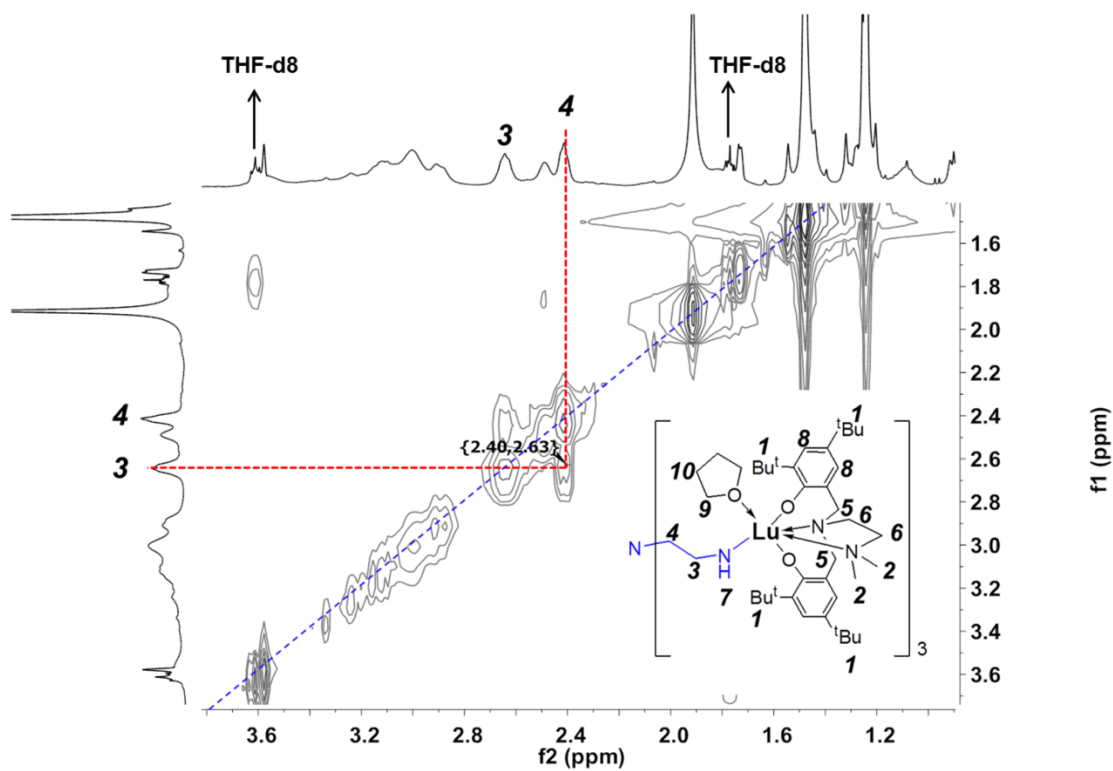

**Figure S3.** Expanded  $^1\text{H}$ - $^1\text{H}$  COSY NMR spectrum of complex **2** (600 MHz, THF-d<sub>8</sub>, 25°C).

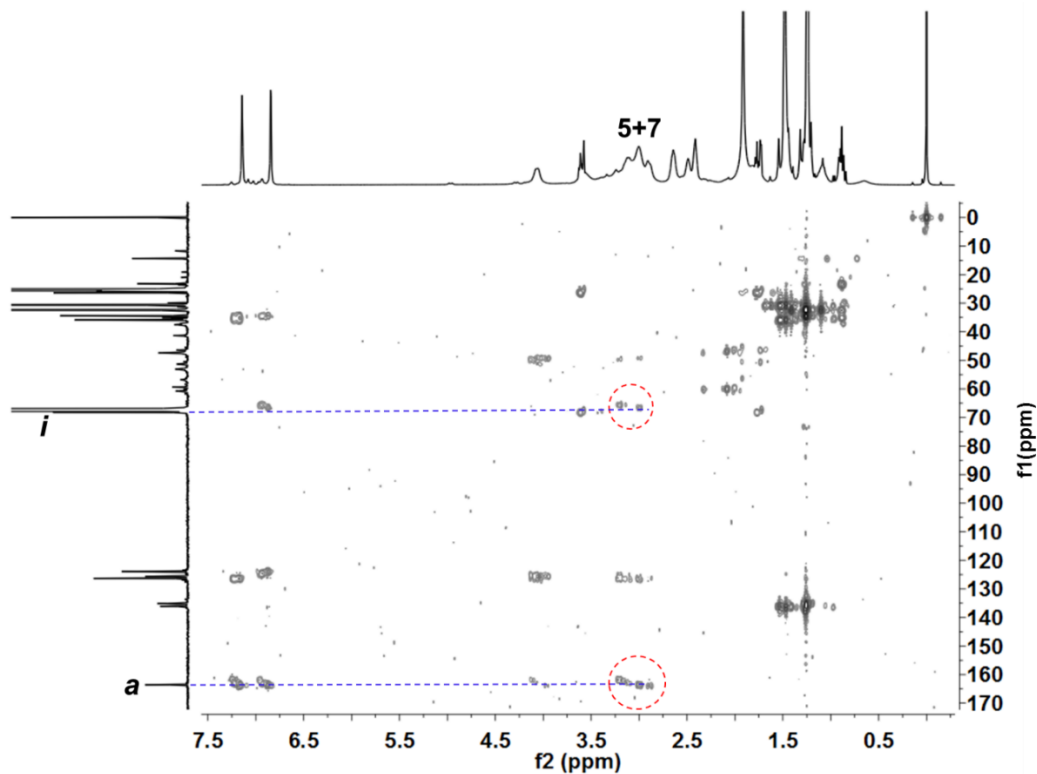

**Figure S4.**  $^1\text{H}$ - $^{13}\text{C}$  HMBC spectrum of complex **2** (600 MHz,  $\text{THF-}d_8$ ,  $25^\circ\text{C}$ ).

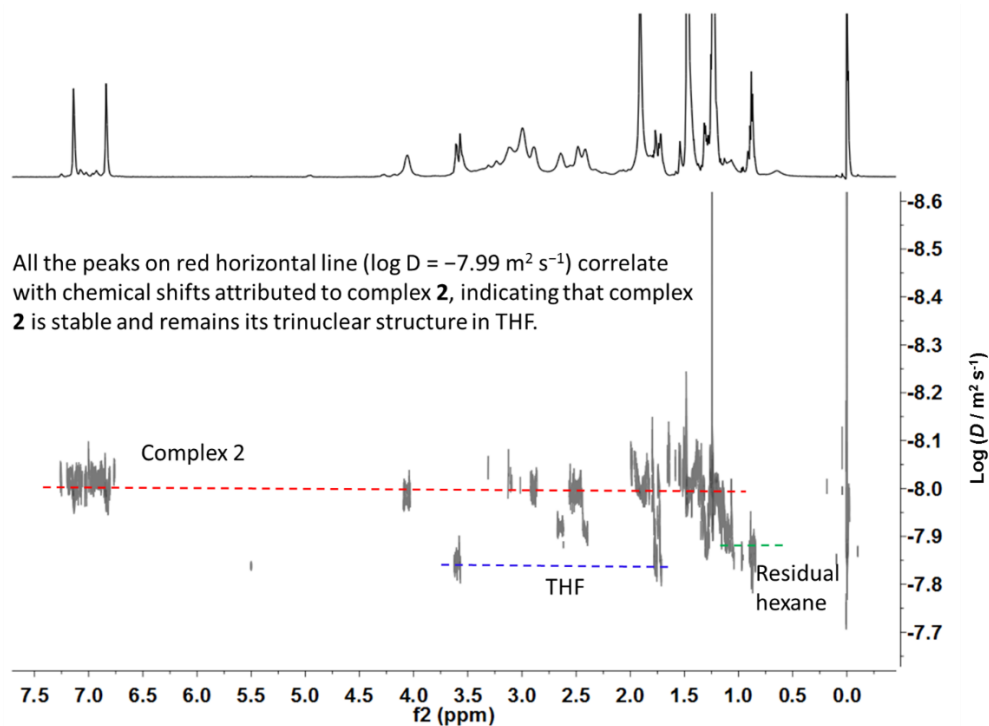

**Figure S5.** 2D DOSY spectrum of complex **2** in ( $600 \text{ MHz}$ ,  $\text{THF-}d_8$ ,  $25^\circ\text{C}$ ). Note: the peaks on three horizontal lines correlate with the chemical shifts of complex **2**, tetrahydrofuran, and hexane (impurity), respectively. The chemical shifts from complex **2** correlate with the  $\log D = -7.99 \text{ m}^2 \text{ s}^{-1}$  line, indicating that complex **2** is stable and remains its trinuclear structure in solution state.

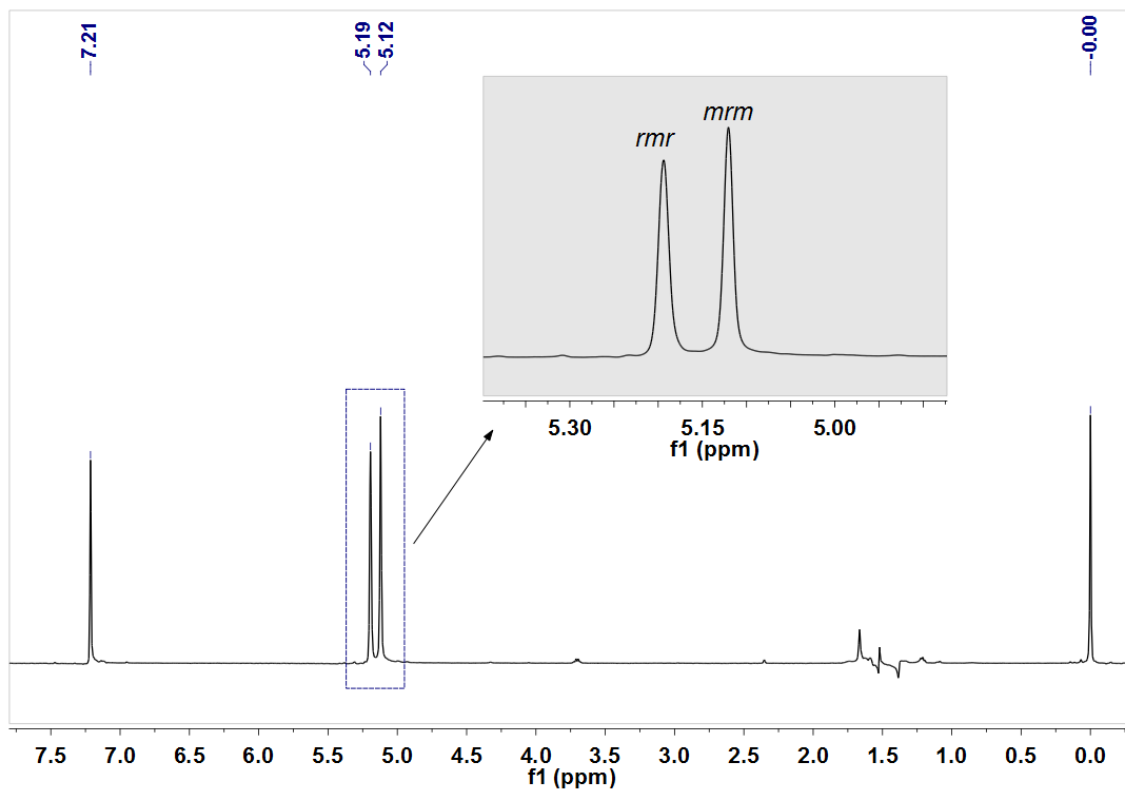

**Figure S6.** Homonuclear decoupled <sup>1</sup>H NMR spectra of the methine region of PLA (Table 1. Entry 1) (400 MHz, CDCl<sub>3</sub>, 25°C)

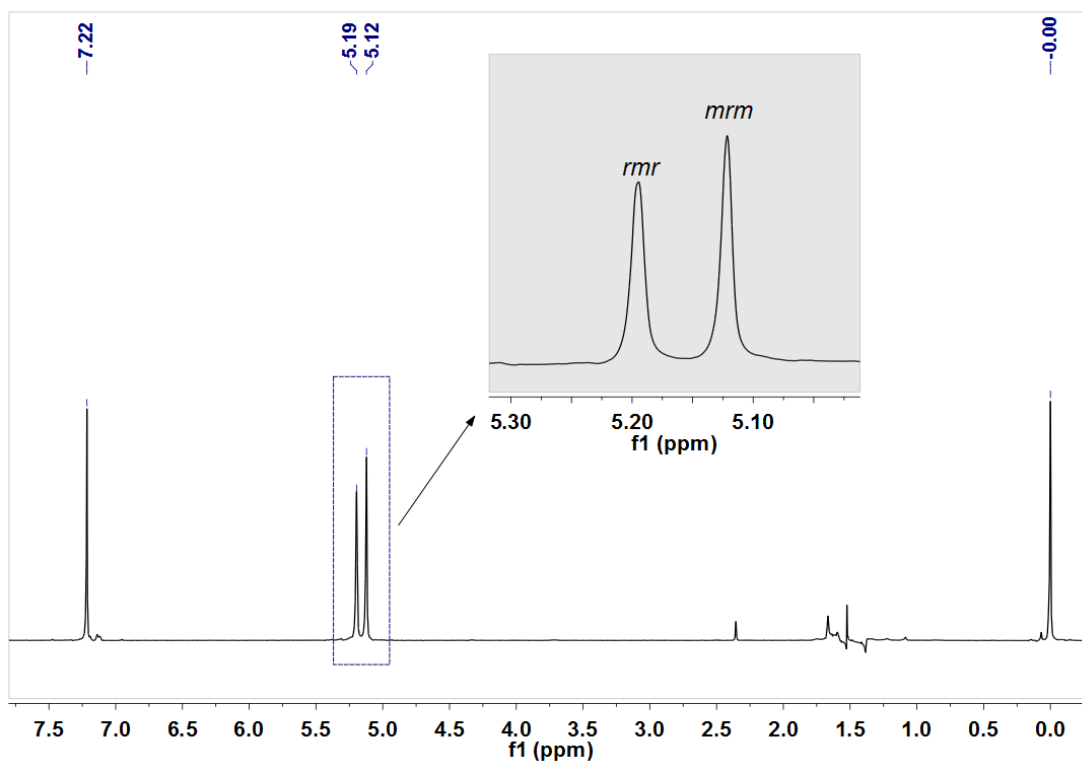

**Figure S7.** Homonuclear decoupled  $^1\text{H}$  NMR spectra of the methine region of PLA (Table 1. Entry 4) (400 MHz,  $\text{CDCl}_3$ ,  $25^\circ\text{C}$ )

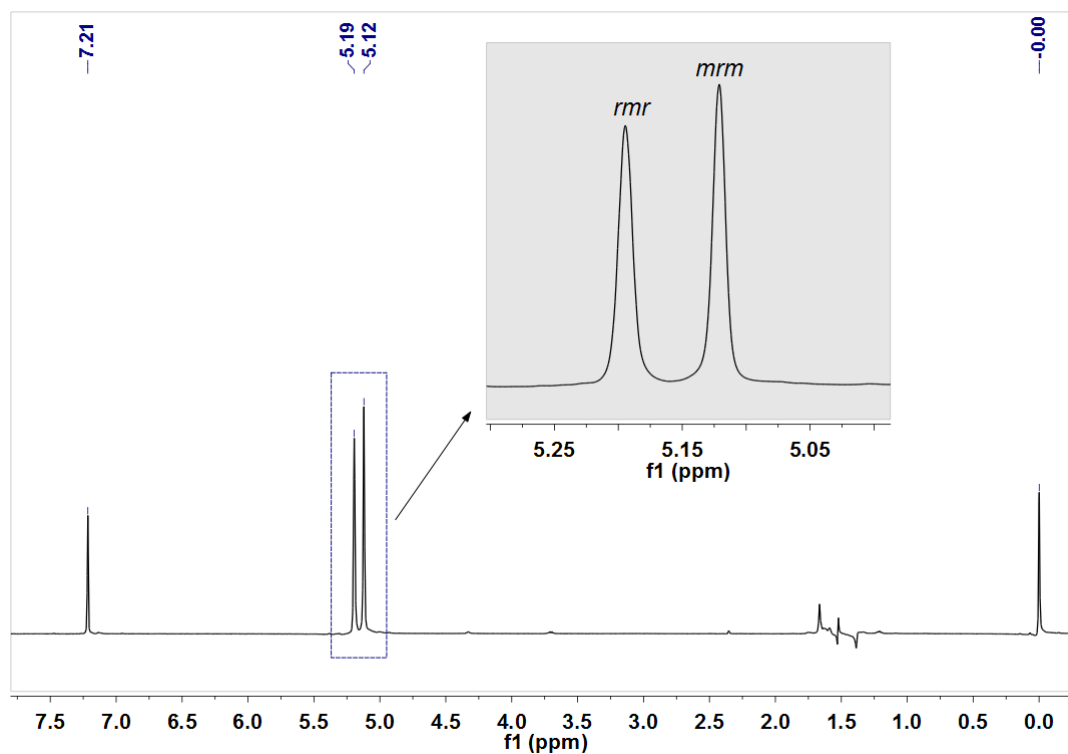

**Figure S8.** Homonuclear decoupled  $^1\text{H}$  NMR spectra of the methine region of PLA (Table 1. Entry 6) (400 MHz,  $\text{CDCl}_3$ ,  $25^\circ\text{C}$ )

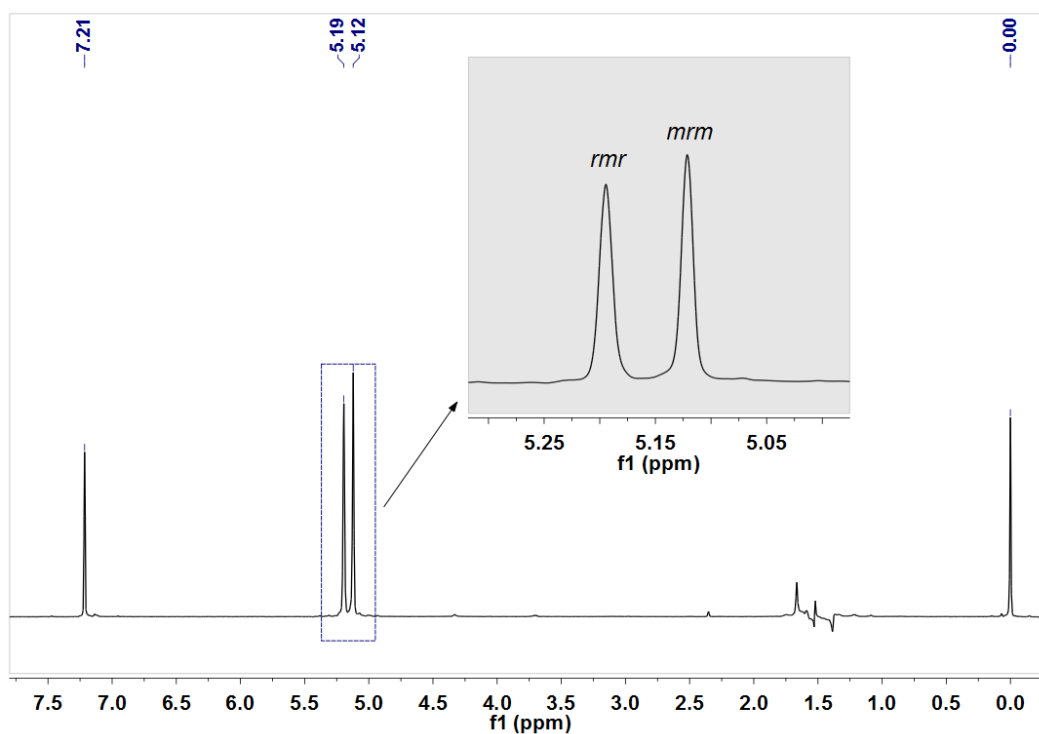

**Figure S9.** Homonuclear decoupled  $^1\text{H}$  NMR spectra of the methine region of PLA (Table 1. Entry 9) (400 MHz,  $\text{CDCl}_3$ ,  $25^\circ\text{C}$ )

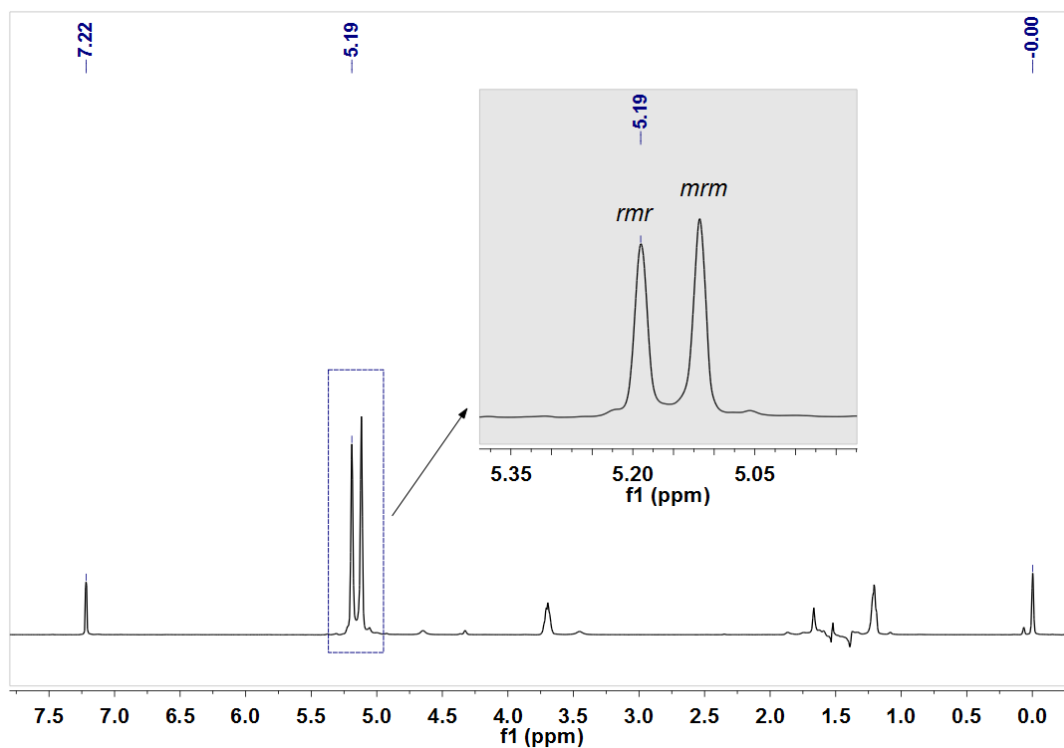

**Figure S10.** Homonuclear decoupled  $^1\text{H}$  NMR spectra of the methine region of PLA (Table 1. Entry 10) (400 MHz,  $\text{CDCl}_3$ ,  $25^\circ\text{C}$ )

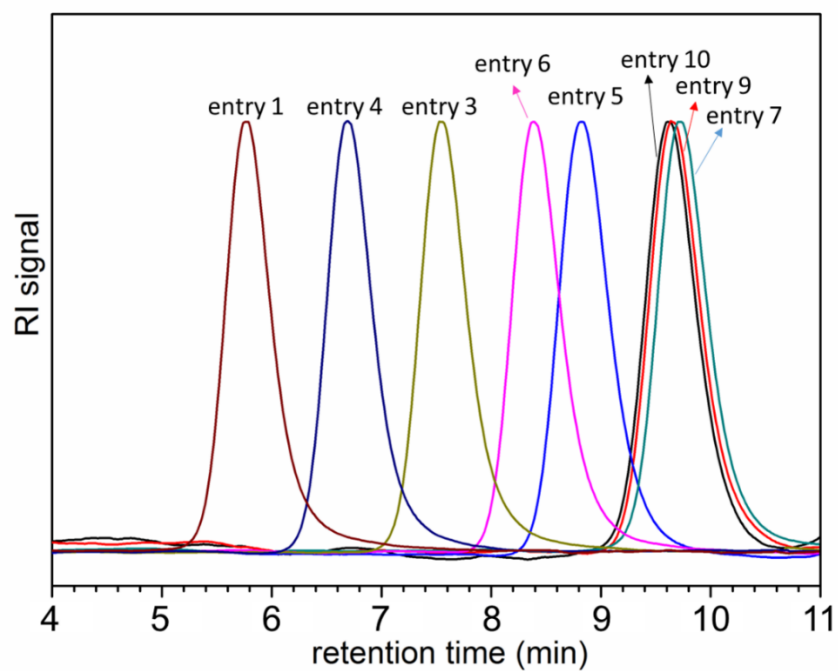

**Figure S11.** Representative GPC traces of obtained polylactides in Table 1.
